# Supplementary material for: Novel 3-D superstructures made up of SnO2@C core-shell nanochains for energy storage applications
Source: Royal Society of Chemistry journal article supplement (doi:10.1039/c0cc03811c), 2010-01-01
Supplement: c0cc03811c.pdf [file c0cc03811c.pdf]

## Novel 3-D superstructures of SnO<sub>2</sub>@C core-shell nanochain for energy storage application

Baohua Zhang,<sup>†,‡</sup> Xiaoyuan Yu,<sup>†</sup> Chunyu Ge,<sup>†</sup> Xianming Dong,<sup>†</sup> Yueping Fang,<sup>\*,†</sup> Zesheng Li<sup>\*,‡</sup> and  
Hongqiang Wang<sup>‡</sup>

<sup>†</sup> Institute of Biomaterial, College of Science, South China Agricultural University, Guangzhou 510642, China;

<sup>‡</sup> Key Laboratory for the Chemistry and Molecular Engineering of Medicinal Resources (Ministry of Education of China), School of Chemistry & Chemical Engineering of Guangxi Normal University, Guilin 541004, P. R. China

Correspondence author: Yueping Fang Tel: 86-20-85285565. Fax: 86-20-85285565.

E-mail: [ypfang@scau.edu.cn](mailto:ypfang@scau.edu.cn); Zesheng Li E-mail: [lzs212@163.com](mailto:lzs212@163.com).

### Supporting information

#### Experimental details

In a typical synthesis, 0.324g of Na<sub>2</sub>SnO<sub>3</sub>·3H<sub>2</sub>O and 6 g of D-glucose were dissolved in 40 mL of deionized water. The solution was then transferred into a 50 mL Teflon-lined stainless steel autoclave, sealed, and kept at 180 °C for 5 h in an oven before cooling down to room temperature. Afterwards, the as-obtained SnO<sub>2</sub>@C precursor were calcined at 700 °C in flowing argon for 2 h to obtain the SnO<sub>2</sub>@C core-shell nanostructure.

#### X-ray diffraction, Raman spectra

Fig. 1(a) shows an X-ray diffraction (XRD) pattern of the SnO<sub>2</sub>@C sample, all the reflection peaks can be well indexed as the tetragonal rutile SnO<sub>2</sub> structure (JCPDS Card No 41-1445). From Raman spectra in Fig. 1(b), it can be found that there are two typical carbon peaks<sup>16</sup> at 1580 cm<sup>-1</sup> (G band) and 1340 cm<sup>-1</sup> (D band) in addition to SnO<sub>2</sub> peaks (A<sub>1g</sub>) at about 630 cm<sup>-1</sup>.<sup>2</sup>

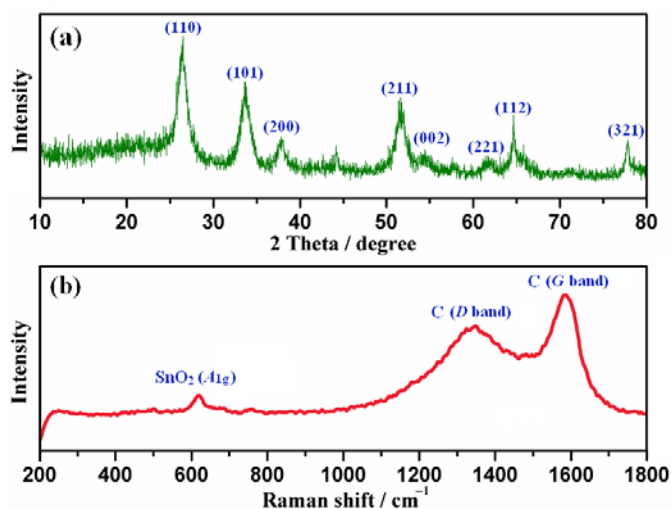

Fig. 1 XRD pattern (a) and Raman spectra (b) of SnO<sub>2</sub>@C sample.

## SnO<sub>2</sub> Content Information

To determine SnO<sub>2</sub> content in SnO<sub>2</sub>@C nanochain sample, both inductively coupled plasma-optical emission spectroscopy (ICP-OES)<sup>1</sup> and thermogravi-metric analysis (TGA)<sup>2</sup> are carried out in this study. Fig. 1 shows the TGA curve under air with a temperature ramp of 10 °C/ min.

Chemical analysis based on ICP-OES shows that the SnO<sub>2</sub>@C nanochain sample contains 37.42 wt.% Sn, which corresponding to a 47.51% SnO<sub>2</sub> content. This result is in agreement with the 45.87% (100%-54.13%) of SnO<sub>2</sub> determined by the TGA.

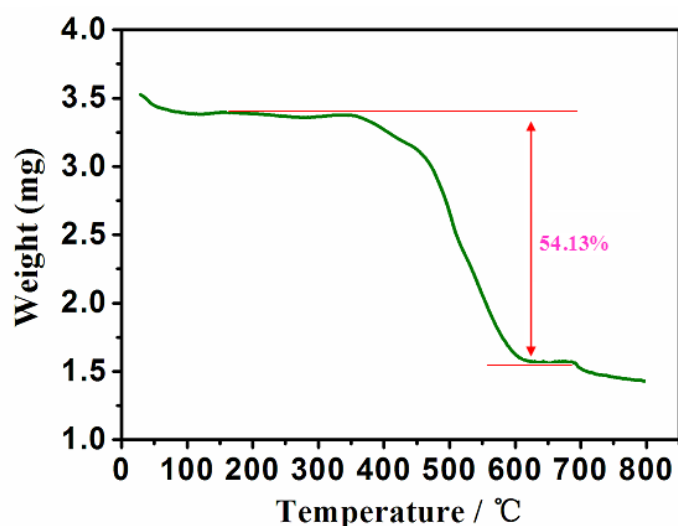

Fig. 2. TGA curve under air with a ramp of 10 °C/min

### References:

1. J. Read, D. Foster, J. Wolfenstine, W. Behl, *J. Power Sources*, 2001, **96**, 277.
2. X.W. Lou, D. Deng, J. Y. Lee, L. A. Archer, *Chem. Mater.*, 2008, **20**, 6562.
